# Supplementary material for: Lactobacillus acidophilus (LA) Fermenting Astragalus Polysaccharides (APS) Improves Calcium Absorption and Osteoporosis by Altering Gut Microbiota
Source: MDPI journal article supplement (doi:10.3390/foods12020275), 2023-01-06
Supplement: s1 [file s1]

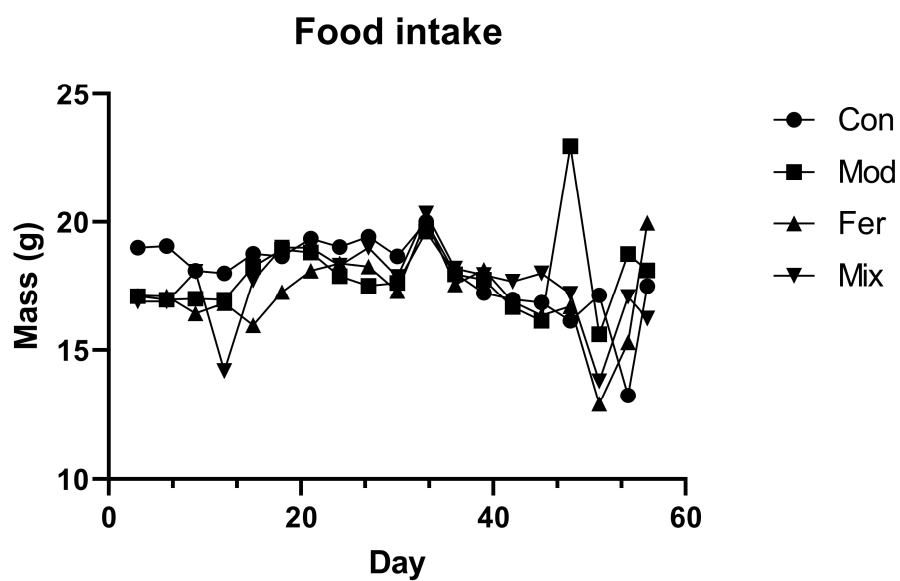

Supplementary Figure S1. Food intake of rats in each group.

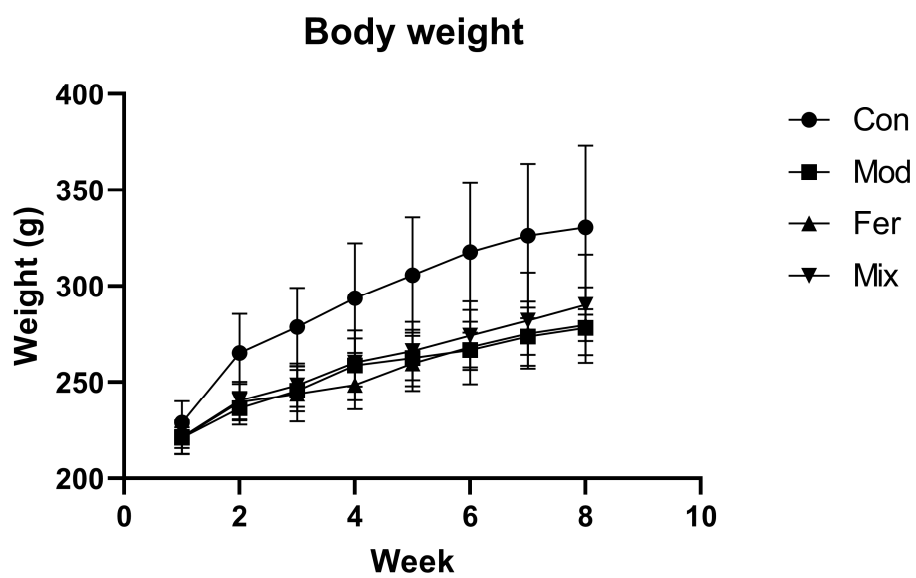

Supplementary Figure S2. Body weight of rats in each group.
